# Supplementary material
Source: PubMed Central journal article supplement (PMC7288356)
Supplement: ao9b04369_si_001.pdf [file ao9b04369_si_001.pdf]

# Identifying the responses from the estrogen receptor expressed MCF7 cells treated in anticancer drugs of different modes of action using live-cell FTIR spectroscopy

Ali Altharawi<sup>a,b</sup>, Khondaker Miraz Rahman<sup>a</sup> and Ka Lung Andrew Chan<sup>a\*</sup>

<sup>a</sup> Institute of Pharmaceutical Science, School of Cancer studies and Pharmaceutical Sciences, King's College London, SE1 9NH

<sup>b</sup> College of Pharmacy, Prince Sattam Bin Abdulaziz University, Kingdom of Saudi Arabia, Al-Kharj 16278

## Supplementary

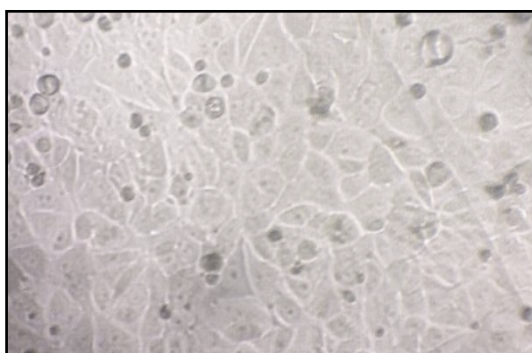

Figure S1: Visible image of MCF7 cells attached on the ZnS ATR crystal after 48 h of seeding.

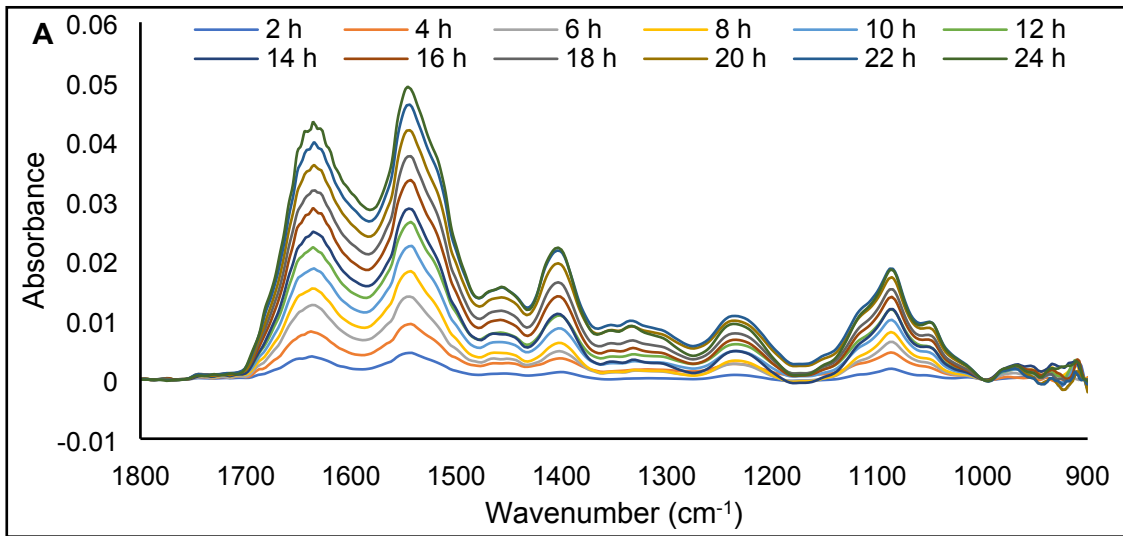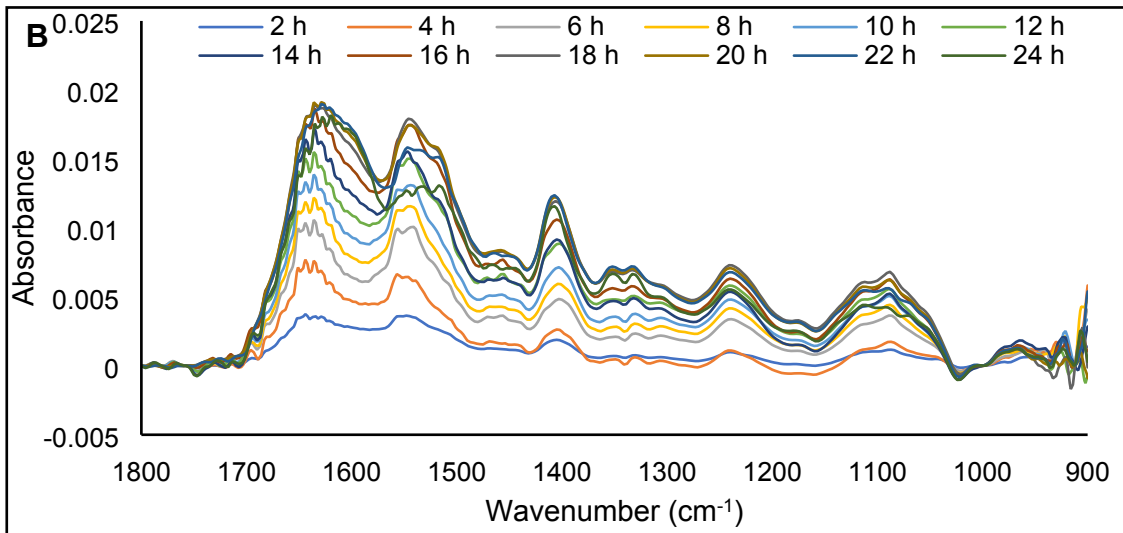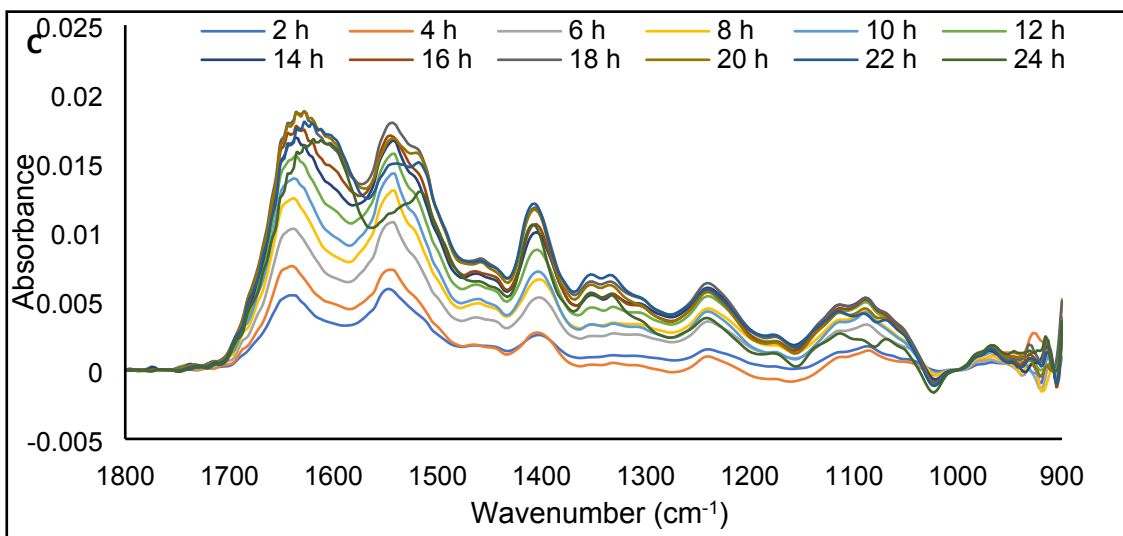

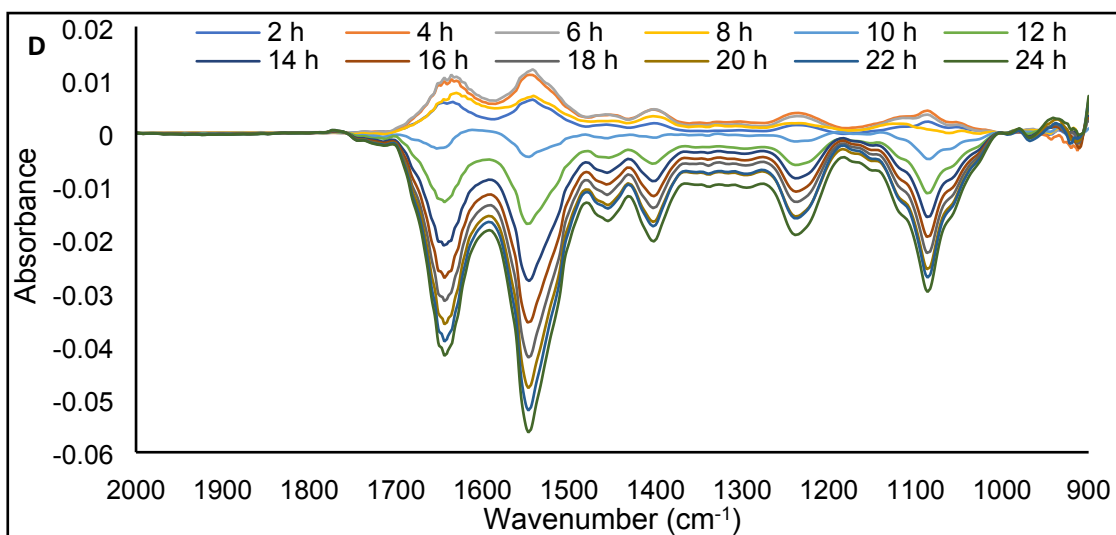

Figure S2: ATR-FTIR difference spectra of live MCF7 cells after exposure to 0.1% DMSO (drug vehicle; control(A)) and IC<sub>50</sub> of tamoxifen (B), toremifene (C), and doxorubicin (D) for 24 h.

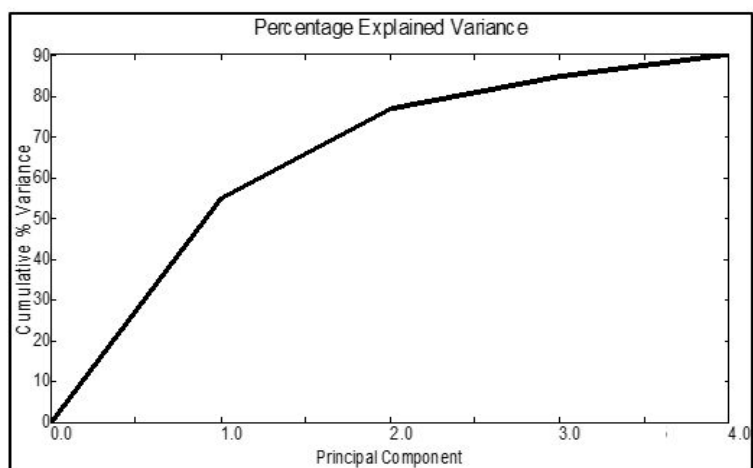

Figure S3: Percentage variance explained as function of the number of principal components of vector normalised difference spectra of live MDA-MB-231 cells for the 2<sup>nd</sup> h exposure to IC50.

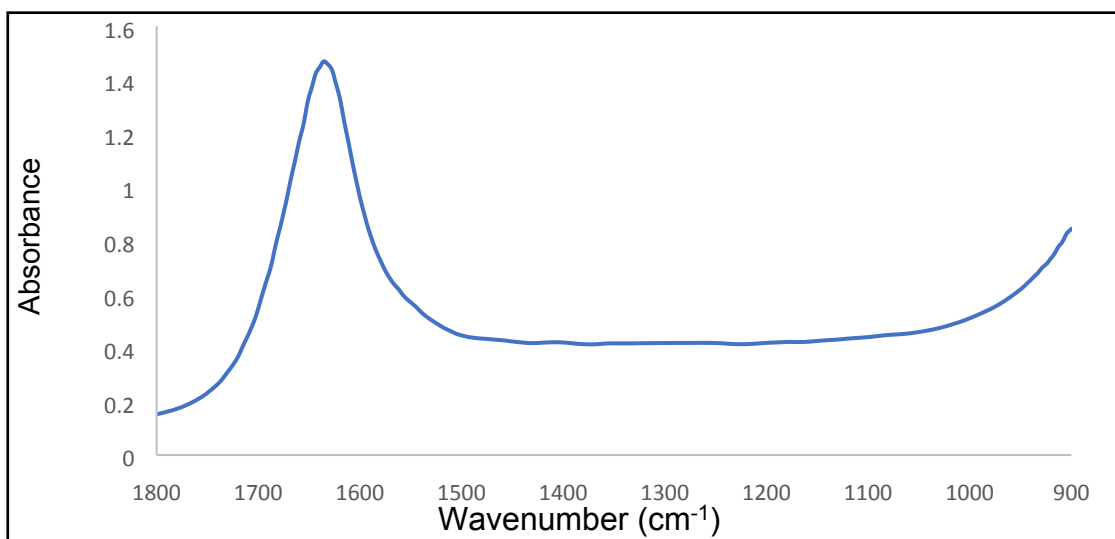

Figure S4: ATR FTIR absorbance of water in the IR fingerprint region (1800-900  $\text{cm}^{-1}$ ). The absorbance of water in amide I of cells ( $\sim 1640 \text{ cm}^{-1}$ ) exceeds 0.8 and indicates possible interference of water band due to saturation of detectors.

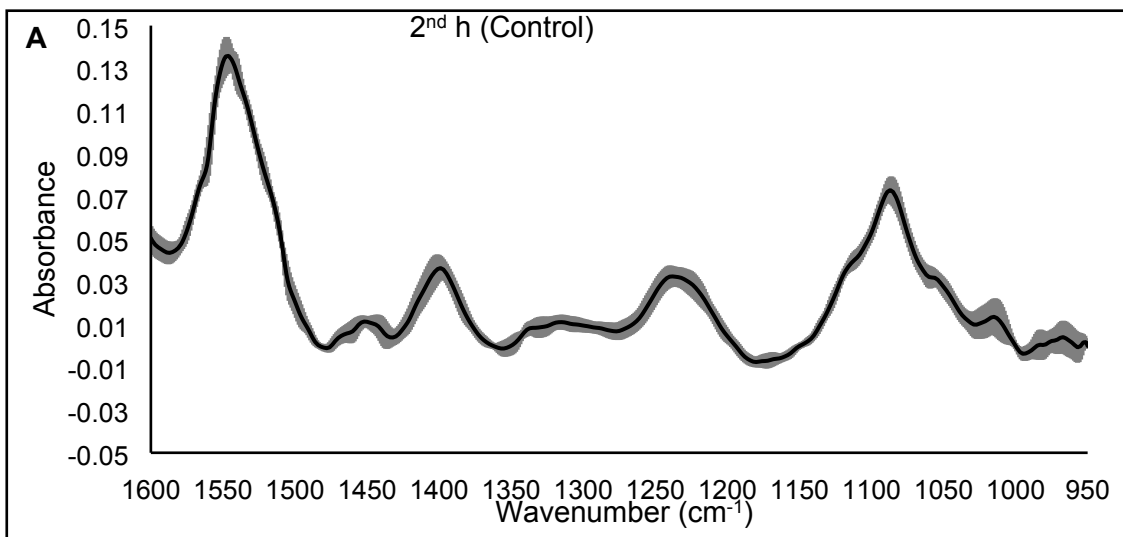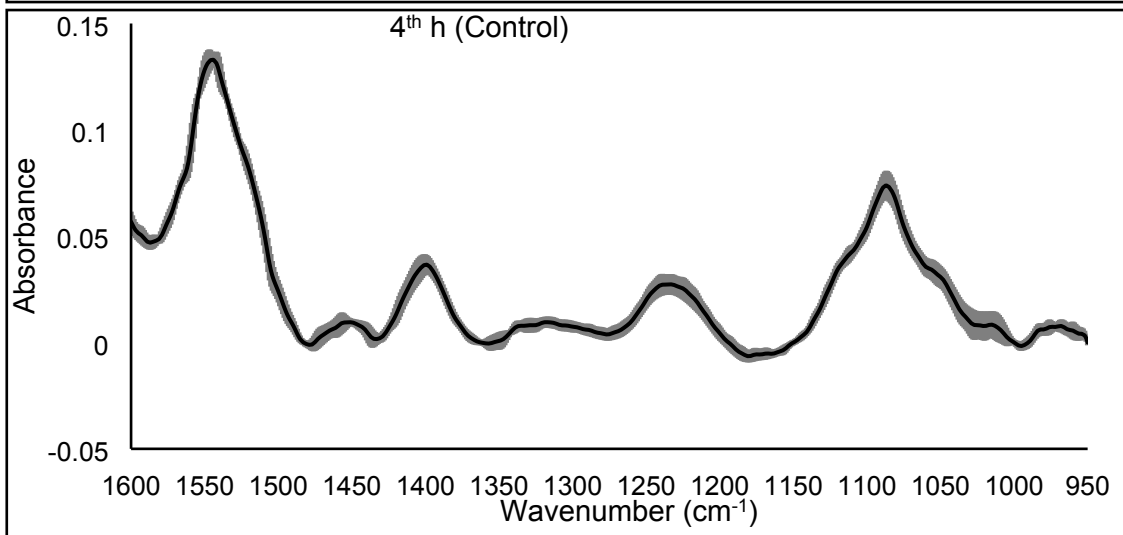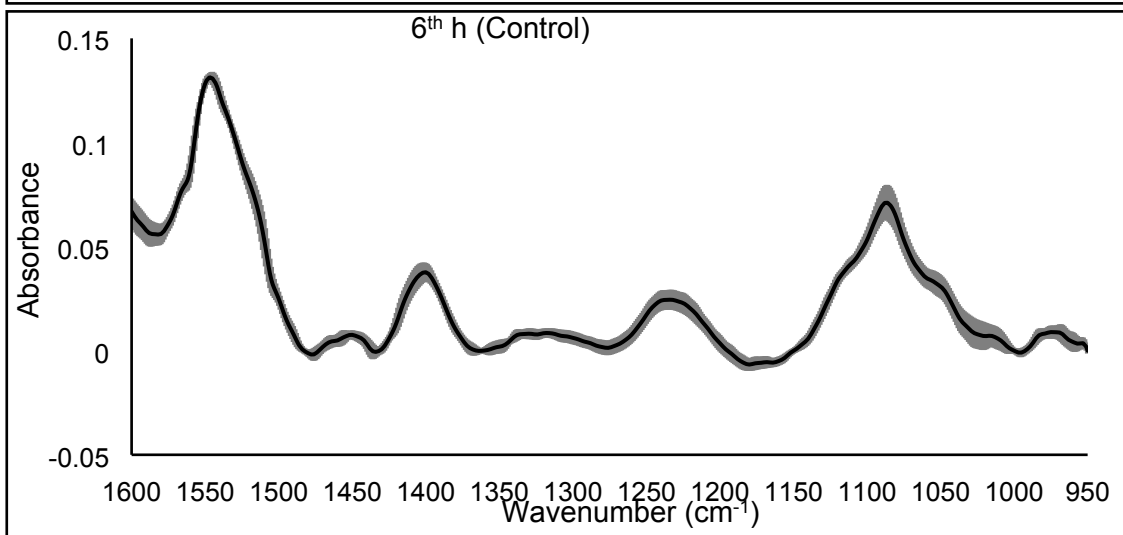

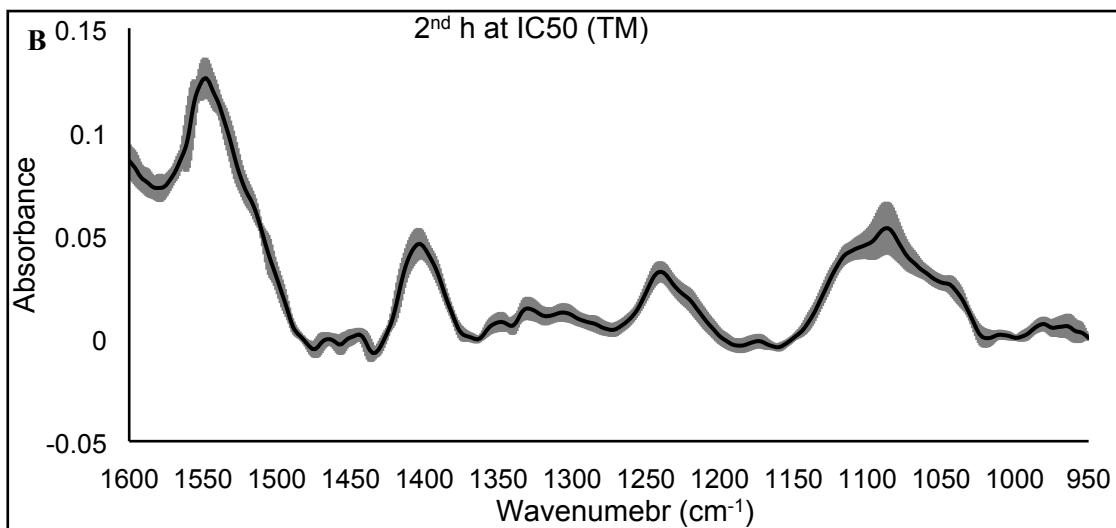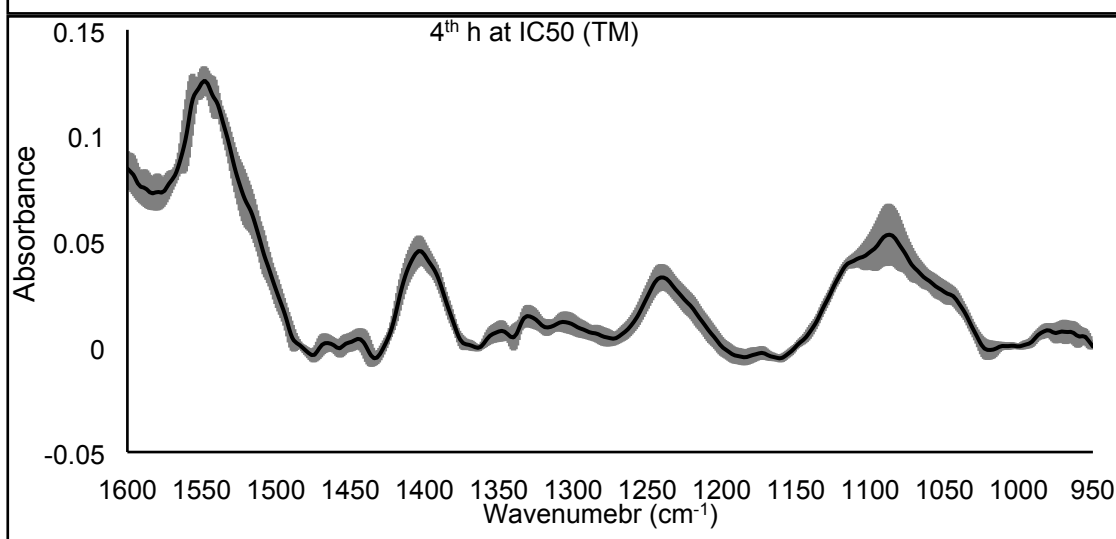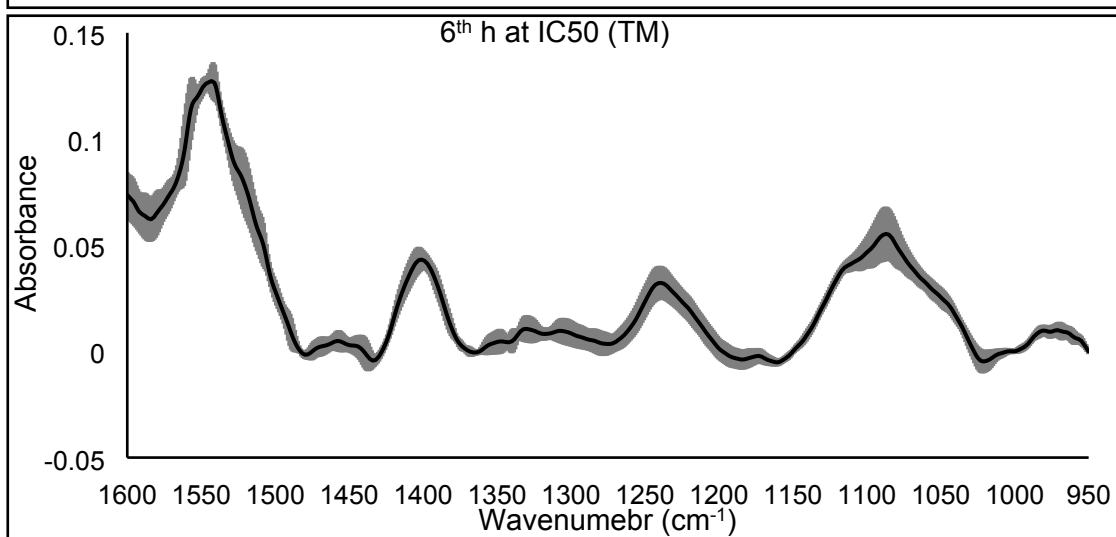

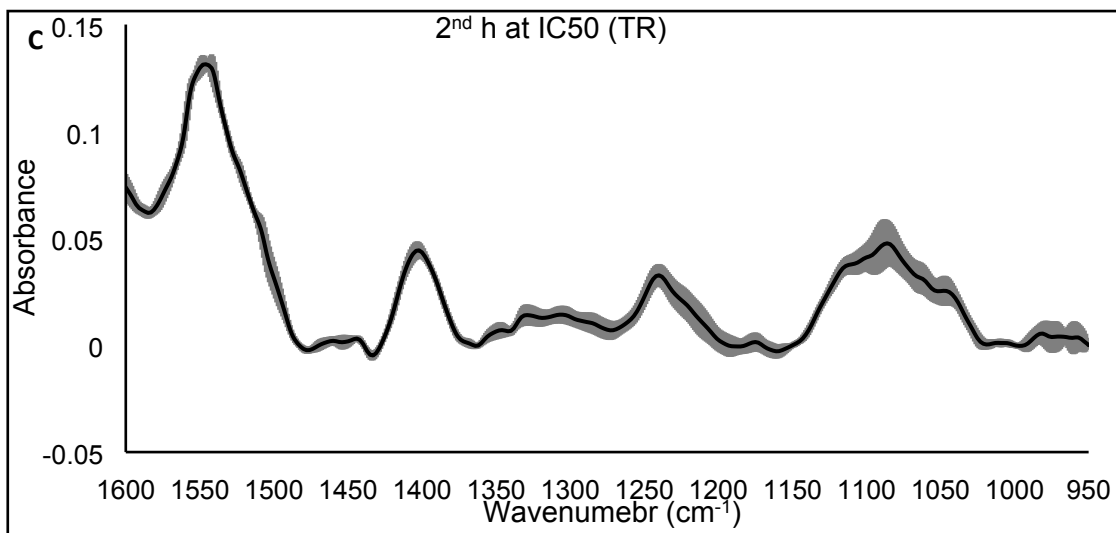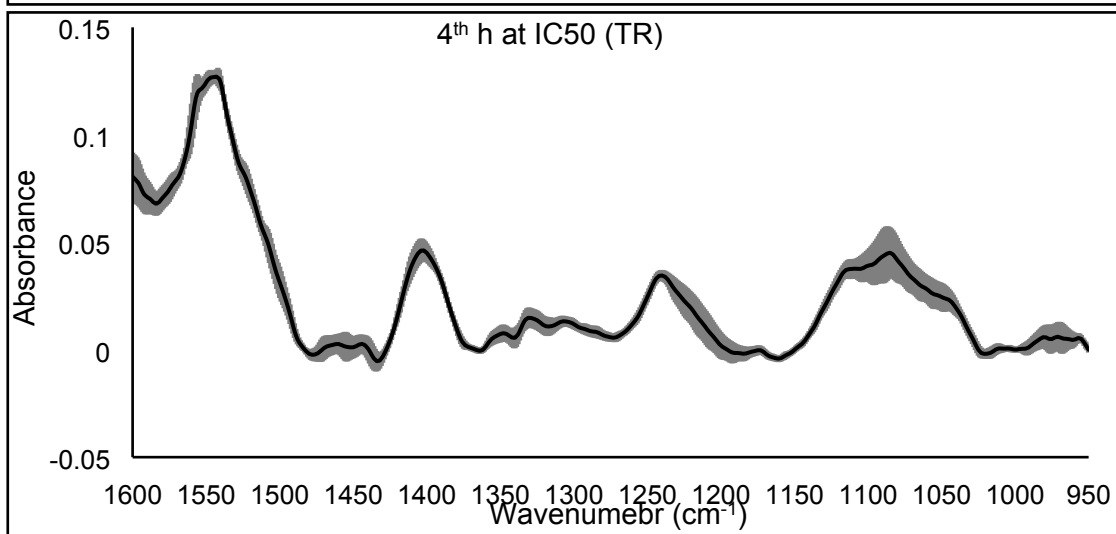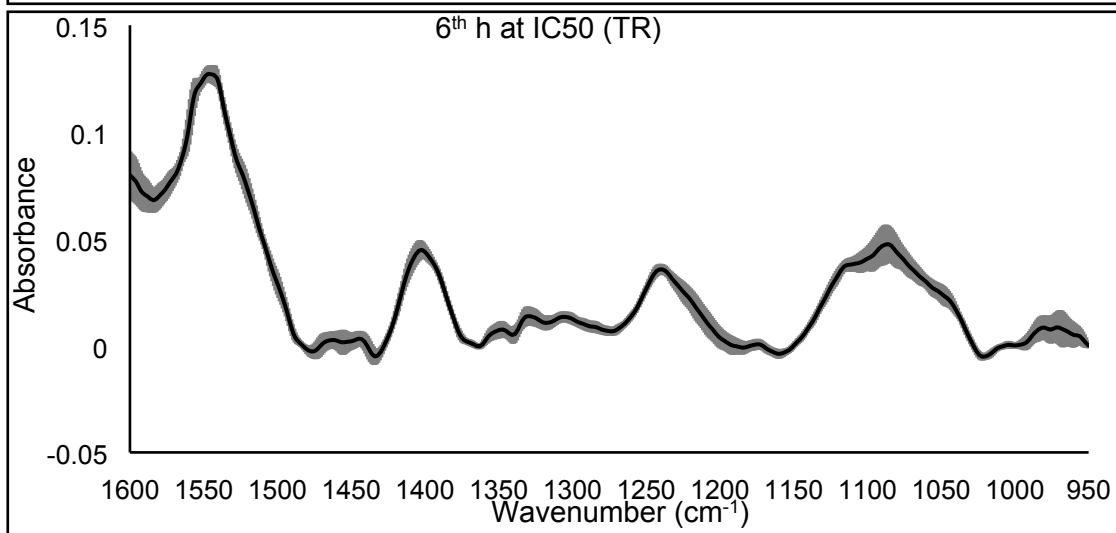



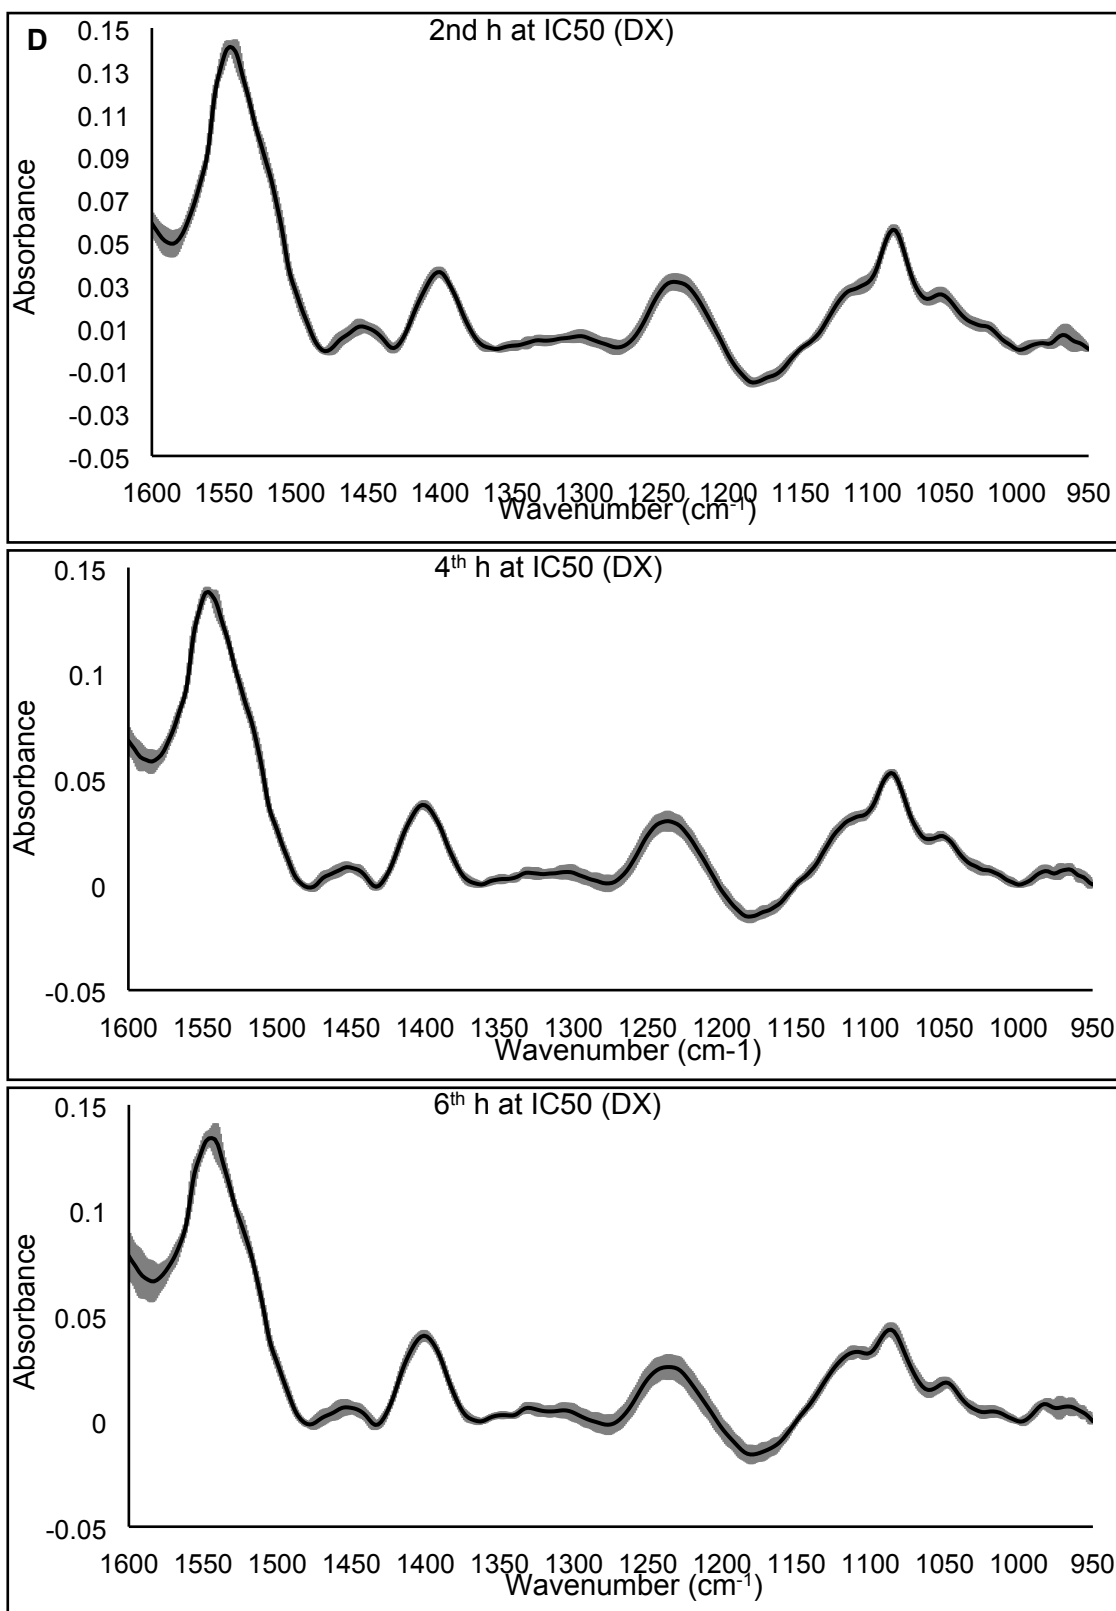

Figure S5: FTIR vector normalised difference spectra of live MCF7 cells after exposure to 0.1% DMSO (drug vehicle; control(A)) and IC<sub>50</sub> of tamoxifen (B), toremifene (C), and doxorubicin (D) for the 2<sup>nd</sup>, 4<sup>th</sup> and 6<sup>th</sup> h. The average spectra of three repeated measurements are presented in (Black line) with error bars shown in (Grey).

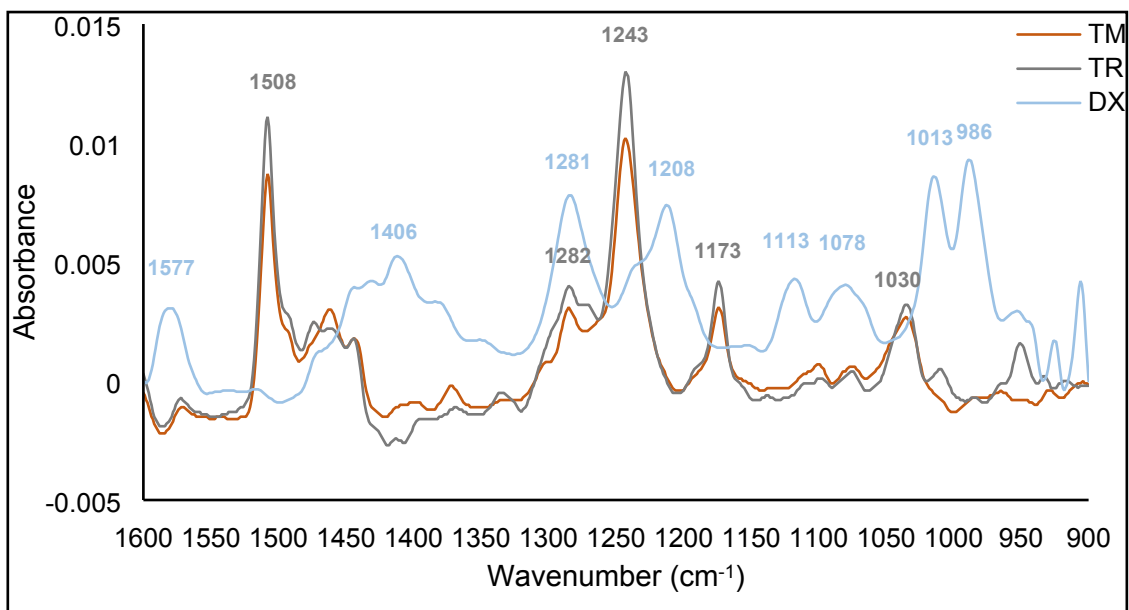

Figure S6: ATR-FTIR spectra of 10mM solution (using water as a background) of tamoxifen (TM), toremifene (TR) and doxorubicin (DX) with IR bands of functional group for each of the drug are highlighted (colour-coded).

A)

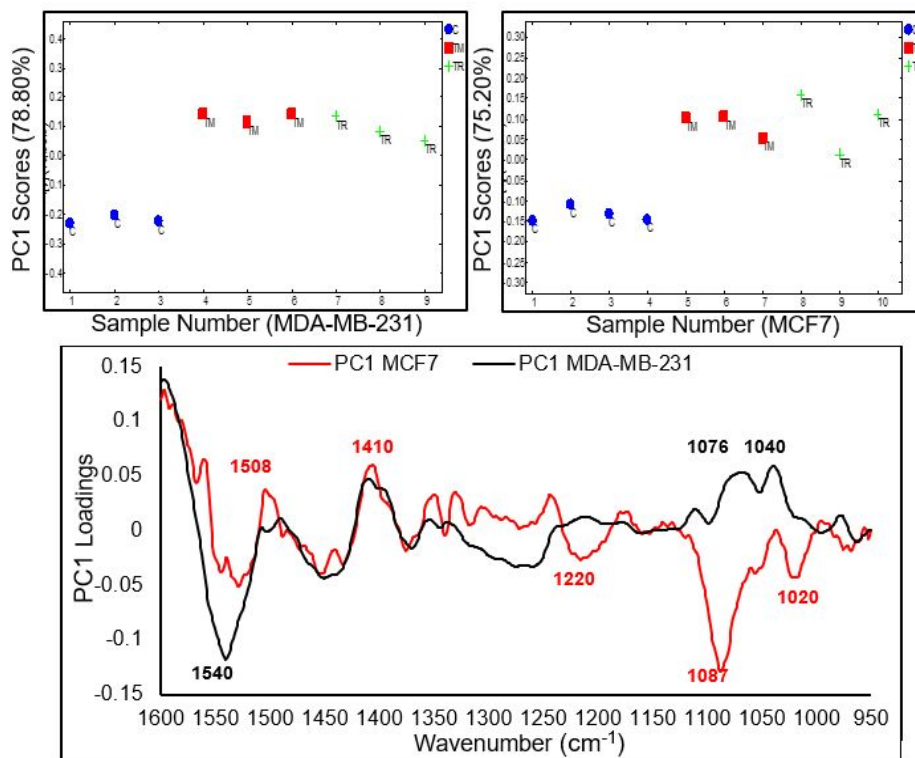

B)

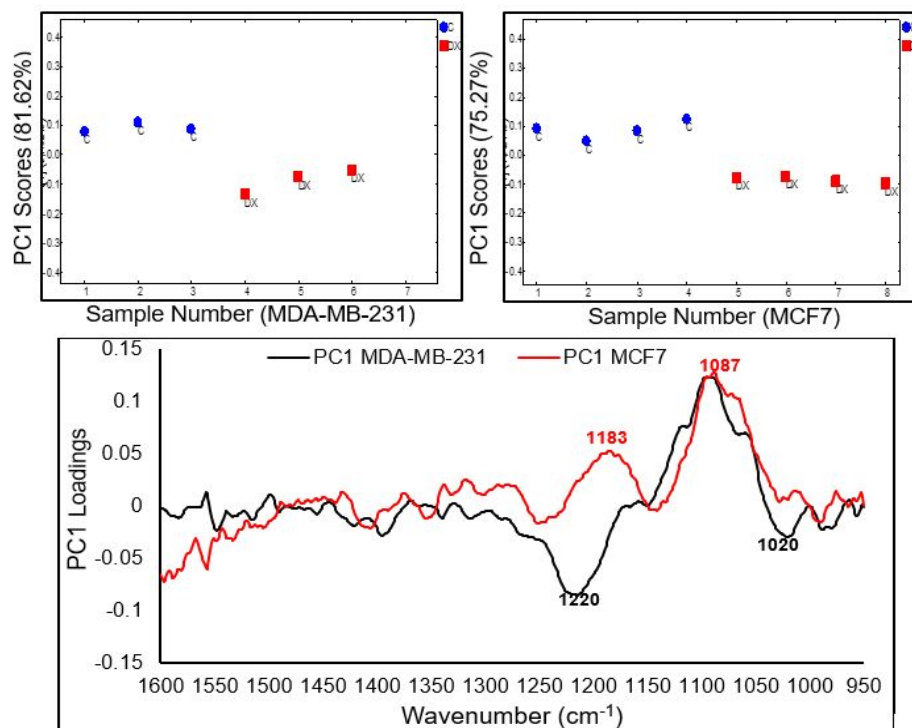

Figure S7: Pairwise PC1 scores and loadings of MCF7 and MDA-MB-231 cells for the 4<sup>th</sup> h of exposure to the IC<sub>50</sub> of tamoxifen/toremifene (A) and doxorubicin (B).

A)

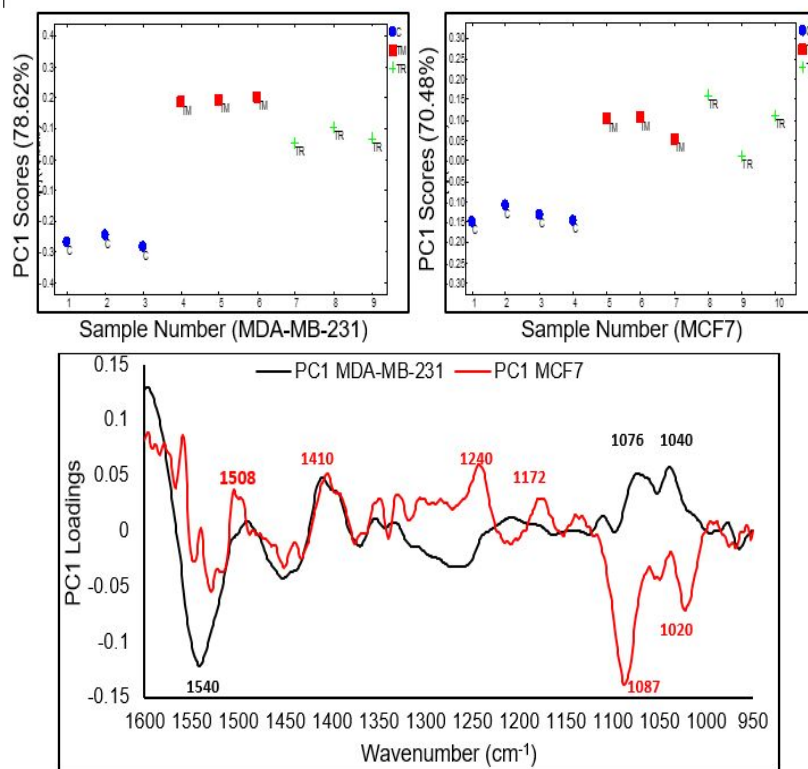

B)

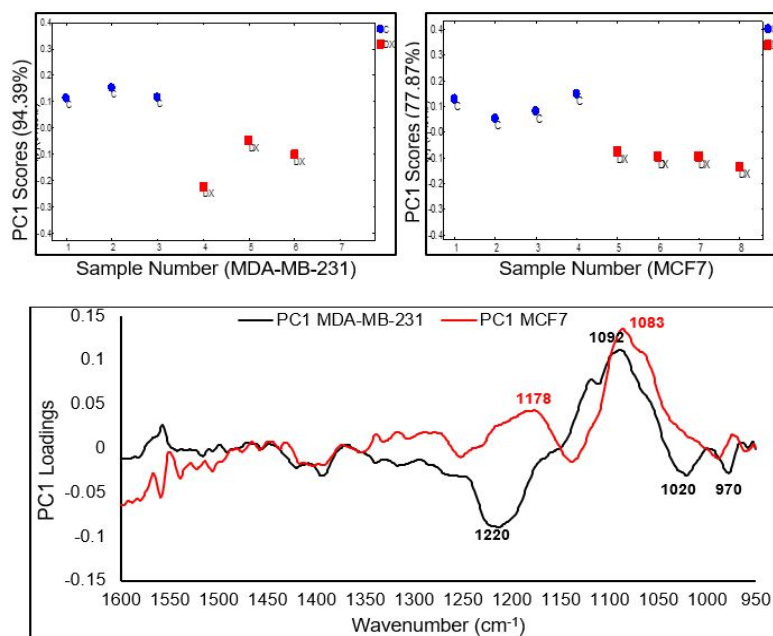

Figure S8: Pairwise PC1 scores and loadings of MCF7 and MDA-Mb-231 cells for the 6<sup>th</sup> h of exposure to the IC<sub>50</sub> of tamoxifen/toremifene (A) and doxorubicin (B).
